# Supplementary material
Source: PubMed Central journal article supplement (PMC5745264)
Supplement: NIHMS919378-supplement.pdf [file NIHMS919378-supplement.pdf]

# Supplementary Figure 1. Gutman et al., 2017

Specimen for tensile Tests

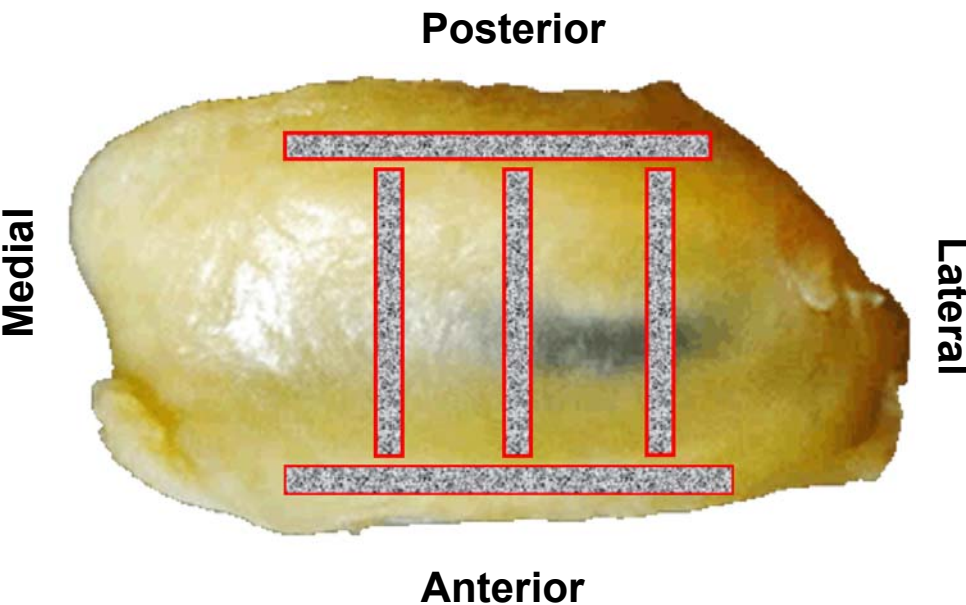

Specimen for compression Tests

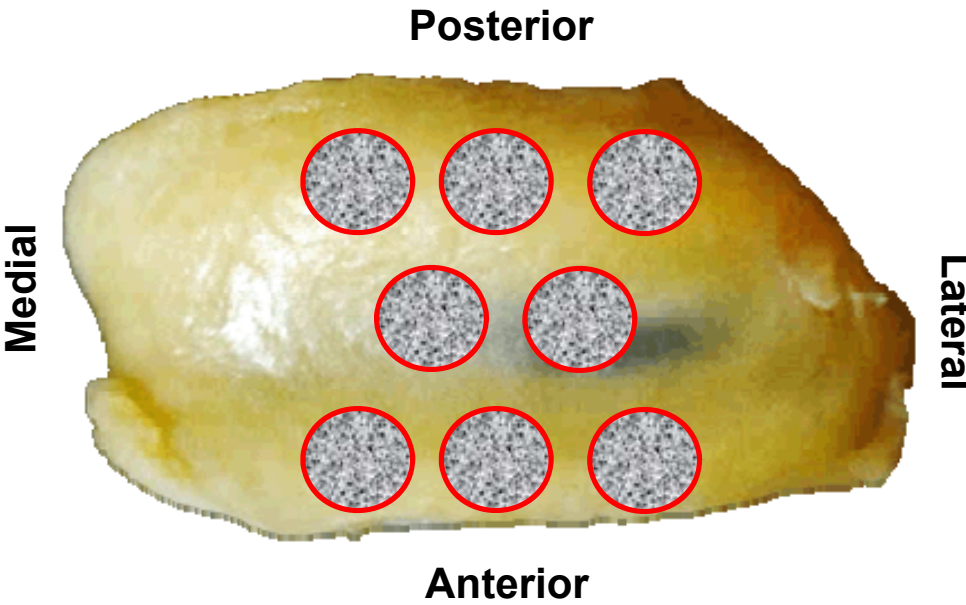

# Supplementary Figure 2. Gutman et al., 2017

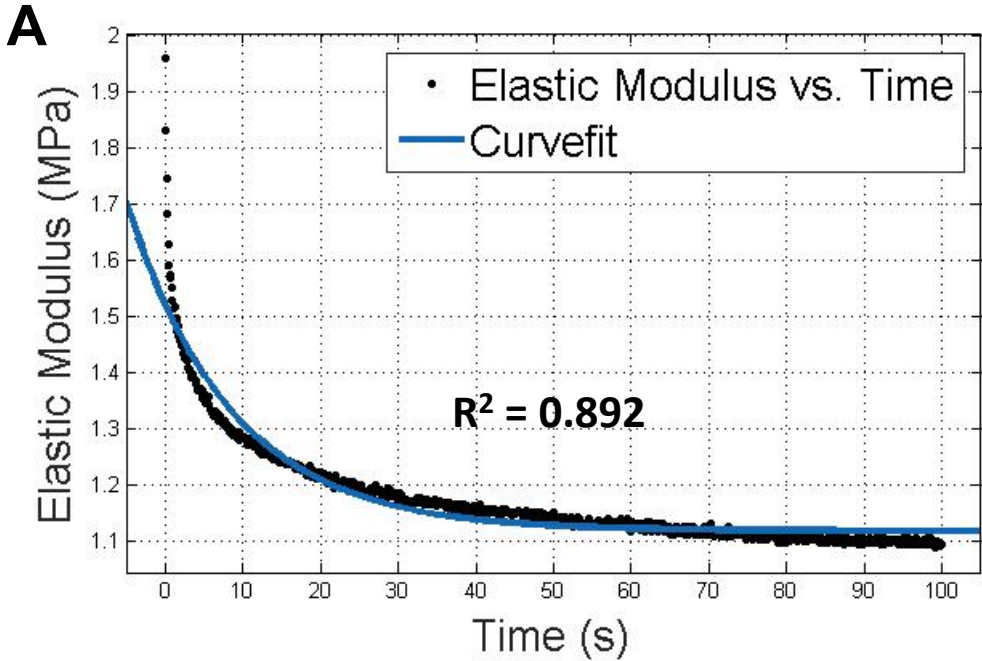

Curve fitting to a Standard solid viscoelastic model

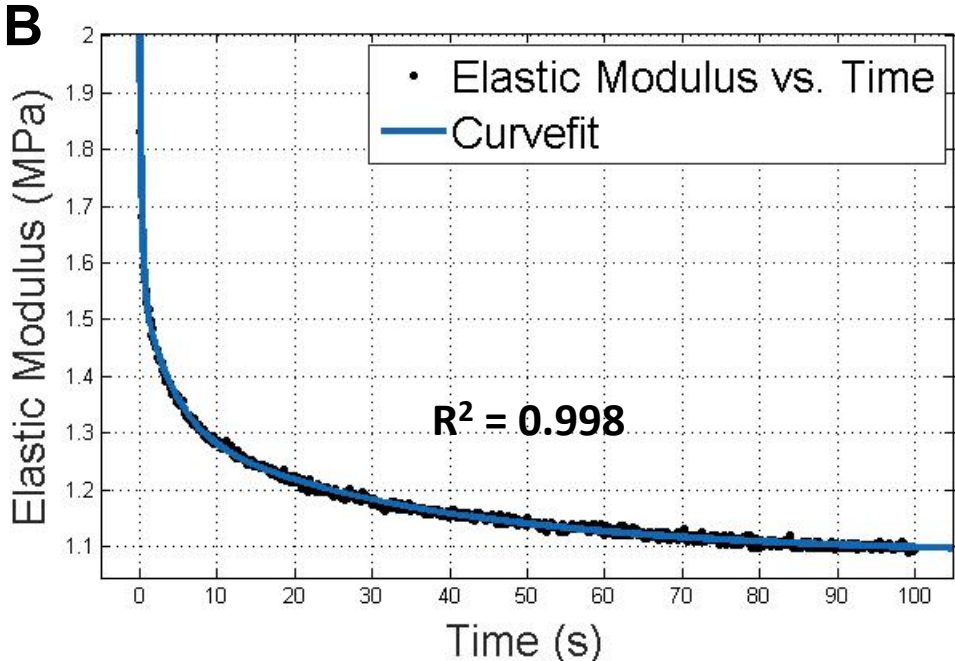

Curve fitting to a Prony series
